# Supplementary material for: Assessing the cost-effectiveness of precision medicine: protocol for a systematic review and meta-analysis
Source: HighWire-hosted journal article supplement (doi:10.1136/bmjopen-2021-057537), 2022-04-01
Supplement: bmjopen-2021-057537supp001_data_supplement.pdf [file bmjopen-2021-057537supp001_data_supplement.pdf]

**Econlit**

AB, TI("biomedical technology assessment" OR "economic evaluation" OR "quality adjusted life year" OR "program cost effectiveness" OR (technology NEAR/3 assessment\*) OR (economic\* NEAR/3 (evaluat\* OR value)) OR ((cost OR costs) NEAR/3 (benefit\* OR effectiv\* OR efficien\* OR efficac\* OR minim\* OR utilit\* OR consequen\*)) OR (qualit\* NEAR/3 adjust\* NEAR/3 (life-year\* OR lifeyear\*)) OR qaly\*)

**AND**

AB, TI("economic model" OR "simulation" OR (model AND (economics OR "economic aspect")) OR "decision tree" OR ((model OR modeling OR modelling OR simulation\* OR microsimulation\*) NEAR/6 (econom\* OR pharmacoeconom\* OR cost OR costs)) OR (decision NEAR/3 (analy\* OR tree OR trees)) OR discrete-event\* OR "state transition" OR markov OR ((individual\* OR patient-level\*) NEAR/3 (sampl\* OR simulation\*)) OR (dynamic NEAR/3 transmission\*) OR probabilistic\* OR partition\*-survival\*)

**AND**

AB, TI("personalized medicine" OR "pharmacogenetics" OR "genetic variation" OR "genetic procedures" OR "genotype" OR "biological marker" OR "gene therapy" OR "immunotherapy" OR "pharmacogenomics" OR "pharmacokinetics" OR ("genetic algorithm" AND (risk OR therapy)) OR "omics" OR "pharmacogenetic testing" OR ((genetic OR gene OR genomic) NEAR/3 (variation OR technique OR procedure OR procedures OR test OR testing OR therapy OR sequence OR sequencing OR profile OR profiling)) OR genotype\* OR (biologic\* NEAR/3 marker\*) OR biomarker\* OR immunotherap\* OR immunetherap\* OR pharmacogenomic\* OR pharmacogenetic\* OR pharmacokinetic\* OR pharmacometabolom\* OR metabolom\* OR proteomic\* OR pharmacoproteomic\* OR lipidomic\* OR pharmacolipidomic\* OR omics)

The screenshot shows the Ovid search history interface. At the top, there are navigation tabs for Search, Journals, Books, Multimedia, My Workspace, and What's New. Below the navigation is a search history table with columns for #, Searches, Results, Type, Actions, and Annotations. Three searches are listed:

| # | Searches                                                                                                                                                                                                                                                                                                                                                                                                                                                                                                                                                                                                                                                                                                                                                                                      | Results | Type  | Actions              | Annotations |
|---|-----------------------------------------------------------------------------------------------------------------------------------------------------------------------------------------------------------------------------------------------------------------------------------------------------------------------------------------------------------------------------------------------------------------------------------------------------------------------------------------------------------------------------------------------------------------------------------------------------------------------------------------------------------------------------------------------------------------------------------------------------------------------------------------------|---------|-------|----------------------|-------------|
| 1 | AB, TI("biomedical technology assessment" OR "economic evaluation" OR "quality adjusted life year" OR "program cost effectiveness" OR (technology NEAR/3 assessment*) OR (economic* NEAR/3 (evaluat* OR value)) OR ((cost OR costs) NEAR/3 (benefit* OR effectiv* OR efficien* OR efficac* OR minim* OR utilit* OR consequen*)) OR (qualit* NEAR/3 adjust* NEAR/3 (life-year* OR lifeyear*)) OR qaly*) (No Related Terms)                                                                                                                                                                                                                                                                                                                                                                     | 25      | Basic | Display Results More |             |
| 2 | AB, TI("economic model" OR "simulation" OR (model AND (economics OR "economic aspect")) OR "decision tree" OR ((model OR modeling OR modelling OR simulation* OR microsimulation*) NEAR/6 (econom* OR pharmacoeconom* OR cost OR costs)) OR (decision NEAR/3 (analy* OR tree OR trees)) OR discrete-event* OR "state transition" OR markov OR ((individual* OR patient-level*) NEAR/3 (sampl* OR simulation*)) OR (dynamic NEAR/3 transmission*) OR probabilistic* OR partition*-survival*) (No Related Terms)                                                                                                                                                                                                                                                                                | 9       | Basic | Display Results More |             |
| 3 | AB, TI("personalized medicine" OR "pharmacogenetics" OR "genetic variation" OR "genetic procedures" OR "genotype" OR "biological marker" OR "gene therapy" OR "immunotherapy" OR "pharmacogenomics" OR "pharmacokinetics" OR ("genetic algorithm" AND (risk OR therapy)) OR "omics" OR "pharmacogenetic testing" OR ((genetic OR gene OR genomic) NEAR/3 (variation OR technique OR procedure OR procedures OR test OR testing OR therapy OR sequence OR sequencing OR profile OR profiling)) OR genotype* OR (biologic* NEAR/3 marker*) OR biomarker* OR immunotherap* OR immunetherap* OR pharmacogenomic* OR pharmacogenetic* OR pharmacokinetic* OR pharmacometabolom* OR metabolom* OR proteomic* OR pharmacoproteomic* OR lipidomic* OR pharmacolipidomic* OR omics) (No Related Terms) | 0       | Basic | Save More            |             |

Below the table, there are buttons for Save, Remove, and Combine with (AND, OR). At the bottom, there are buttons for Save All, Edit, Create RSS, View Saved, Email All Search History, Copy Search History Link, and Copy Search History Details.

**CRD**

((personalized OR personalised OR individualised OR individualized OR precision OR stratif\* OR targeted\* OR algorithm\*) NEAR6 (medicine\* OR therap\* OR treat\* OR risk OR regimen\* OR dosing\* OR duration OR decision\*)) OR ((genetic\* OR gene OR genom\* OR molecular\*) NEAR3 (variation\* OR technique\* OR procedure\* OR test OR testing OR therap\* OR sequenc\* OR profil\*) OR genotype\* OR (biologic\* NEAR3 marker\*) OR biomarker\* OR telemonitor\* OR (mobile NEAR3 (applicat\* OR app OR apps)) OR wearable\* OR (personal\* NEAR3 digital\* NEAR3 assistant\*) OR (handheld NEAR3 computer\*) OR ((mobile OR cell\*) NEAR1 phone\*) OR smartphone\* OR immunotherap\* OR immunetherap\* OR immun\*-therap\* OR pharmacogenomic\* OR pharmacogenetic\* OR pharmacokinetic\* OR (pharmac\* NEAR3 (genomic\* OR genetic\* OR kinetic\*)) OR (digital NEAR3 (health OR medicine)) OR mHealth\* OR eHealth\* OR m-Health\* OR e-Health\* OR tracker\* OR (data NEAR3 analytic\*) OR (artificial\* NEAR3 intelligen\*) OR (machine\* NEAR3 learning) OR ((remote OR self) NEAR3 monitor\*) OR pharmacometabolom\* OR metabolom\* OR proteomic\* OR pharmacoproteomic\* OR lipidomic\* OR pharmacolipidomic\* OR omics OR (model\* NEAR3 (guide\* OR base\*) NEAR3 (medicine\* OR therap\* OR treat\* OR risk OR regimen\* OR dosing\* OR duration)) OR (risk NEAR3 score\*)):ab,ti

OR MeSH DESCRIPTOR Precision Medicine IN NHSEED,HTA

OR MeSH DESCRIPTOR Pharmacogenetics IN NHSEED,HTA

OR MeSH DESCRIPTOR Pharmacogenetics IN NHSEED,HTA

OR MeSH DESCRIPTOR Genetic Variation IN NHSEED, HTA

OR MeSH DESCRIPTOR Genotype IN NHSEED,HTA

OR MeSH DESCRIPTOR Biomarkers IN NHSEED,HTA

OR MeSH DESCRIPTOR Mobile Applications IN NHSEED,HTA

OR MeSH DESCRIPTOR Computers, Handheld IN NHSEED,HTA

OR MeSH DESCRIPTOR Cell Phones IN NHSEED,HTA

OR MeSH DESCRIPTOR Genetic Therapy EXPLODE ALL TREES IN NHSEED,HTA

OR MeSH DESCRIPTOR Molecularly Targeted Therapy EXPLODE ALL TREES IN NHSEED,HTA

OR MeSH DESCRIPTOR Pharmacokinetics EXPLODE ALL TREES IN NHSEED,HTA

OR MeSH DESCRIPTOR Fitness Trackers IN NHSEED,HTA

OR MeSH DESCRIPTOR Artificial Intelligence IN NHSEED,HTA

OR MeSH DESCRIPTOR Machine Learning IN NHSEED,HTA

OR MeSH DESCRIPTOR Algorithms IN NHSEED, HTA

OR MeSH DESCRIPTOR Pharmacogenomic Testing IN NHSEED,HTA

AND \* IN NHSEED, HTA WHERE LPD FROM 01/01/2009 TO 08/07/2021

Search results [439 hits] Selected records [0 hits]

Any field dropdown | (((personalized OR personalised C | OR dropdown |  DARE |  CRD assessed review (bibliographic) |  CRD assessed review (full abstract) |  Cochrane review |  Cochrane related review record

Title dropdown | | OR dropdown |  NHS EED |  CRD assessed economic evaluation (bibliographic) |  CRD assessed economic evaluation (full abstract)

Author dropdown | | OR dropdown |  HTA |  HTA in progress |  HTA published

Record date | to |

Publication year | to |

Search Clear MeSH search

Results for: (((personalized OR personalised OR individualised OR individualized OR precision OR stratif\* OR targeted\* OR algorithm\*) NEAR/6 (medicine\* OR therap\* OR treat\* OR risk OR regimen\* OR dosing\* OR duration OR decision\*)) OR ((genetic\* OR gene OR genom\* OR molecular\*) NEAR/3 (variation\* OR technique\* OR procedure\* OR test OR testing OR therap\* OR sequenc\* OR profil\*)) OR genotype\* OR (biologic\* NEAR/3 marker\*) OR biomarker\* OR telmonitor\* OR (mobile NEAR/3 (applicat\* OR app OR apps)) OR wearable\* OR (personal\* NEAR/3 digital\* NEAR/3 assistant\*) OR (handheld NEAR/3 computer\*) OR ((mobile OR cell\*) NEAR/1 phone\*) OR smartphone\* OR immunotherap\* OR immunetherap\* OR immun\*.therap\* OR pharmacogenomic\* OR pharmacogenetic\* OR pharmacokinetic\* OR (pharmac\* NEAR/3 (genomic\* OR genetic\* OR kinetic\*)) OR (digital NEAR/3 (health OR medicine)) OR m-Health\* OR e-Health\* OR m-Health\* OR e-Health\* OR tracker\* OR (data NEAR/3 analytic\*) OR (artificial\* NEAR/3 intelligent\*) OR (machine\* NEAR/3 learning\*) OR ((remote OR self) NEAR/3 monitor\*) OR pharmacometabolom\* OR metabolom\* OR proteomic\* OR pharmacoproteomic\* OR lipidomic\* OR pharmacolipidomic\* OR omics OR (model\* NEAR/3 (guide\* OR base\*) NEAR/3 (medicine\* OR therap\* OR treat\* OR risk OR regimen\* OR dosing\* OR duration)) OR (risk NEAR/3 score\*))):ab,ti OR MeSH DESCRIPTOR Precision Medicine IN NHSEED,HTA OR MeSH DESCRIPTOR Pharmacogenetics IN NHSEED,HTA OR MeSH DESCRIPTOR Pharmacogenetics IN NHSEED,HTA OR MeSH DESCRIPTOR Genetic Variation IN NHSEED, HTA OR MeSH DESCRIPTOR Genotype IN NHSEED,HTA OR MeSH DESCRIPTOR Biomarkers IN NHSEED,HTA OR MeSH DESCRIPTOR Mobile Applications IN NHSEED,HTA OR MeSH DESCRIPTOR Computers, Handheld IN NHSEED,HTA OR MeSH DESCRIPTOR Cell Phones IN NHSEED,HTA OR MeSH DESCRIPTOR Genetic Therapy EXPLODE ALL TREES IN NHSEED,HTA OR MeSH DESCRIPTOR Molecularly Targeted Therapy EXPLODE ALL TREES IN NHSEED,HTA OR MeSH DESCRIPTOR Pharmacokinetics EXPLODE ALL TREES IN NHSEED,HTA OR MeSH DESCRIPTOR Fitness Trackers IN NHSEED,HTA OR MeSH DESCRIPTOR Artificial Intelligence IN NHSEED,HTA OR MeSH DESCRIPTOR Machine Learning IN NHSEED,HTA OR MeSH DESCRIPTOR Algorithms IN NHSEED, HTA OR MeSH DESCRIPTOR Pharmacogenomic Testing IN NHSEED,HTA AND \* IN NHSEED, HTA WHERE LPD FROM 01/01/2009 TO 08/07/2021)

First 1 2 3 4 5 6 7 8 9 10 > Last Show all previews Select all Clear selections Export

Embase and Medline

('biomedical technology assessment'/exp OR 'biomedical technology assessment' OR 'economic evaluation'/exp OR 'economic evaluation' OR 'quality adjusted life year'/exp OR 'quality adjusted life year' OR 'program cost effectiveness'/exp OR 'program cost effectiveness' OR ((technology NEAR/3 assessment\*):ab,ti) OR ((economic\* NEAR/3 (evaluat\* OR value)):ab,ti) OR (((cost OR costs) NEAR/3 (benefit\* OR effectiv\* OR efficien\* OR efficac\* OR minim\* OR utilit\* OR consequen\*)):ab,ti) OR ((qualit\* NEAR/3 adjust\* NEAR/3 ('life year\*' OR lifeyear\*)):ab,ti) OR qaly\*:ab,ti)

AND ('economic model'/exp OR 'economic model' OR 'simulation'/exp OR 'simulation' OR (('model'/exp OR model) AND ('economics'/exp OR economics OR 'economic aspect'/exp OR 'economic aspect')) OR 'decision tree'/exp OR 'decision tree' OR (((model OR modeling OR modelling OR simulation\* OR microsimulation\*) NEAR/6 (econom\* OR pharmacoconom\* OR cost OR costs)):ab,ti) OR ((decision NEAR/3 (analy\* OR tree OR trees)):ab,ti) OR 'discrete event\*':ab,ti OR 'state transition':ab,ti OR markov:ab,ti OR (((individual\* OR 'patient level\*') NEAR/3 (sampl\* OR simulation\*)):ab,ti) OR ((dynamic NEAR/3 transmission\*):ab,ti) OR probabilistic\*:ab,ti OR 'partition\* survival\*':ab,ti)



TS((((technology NEAR/2 assessment\*) OR (economic\* NEAR/2 (evaluat\* OR value)) OR ((cost OR costs) NEAR/2 (benefit\* OR effectiv\* OR efficien\* OR efficac\* OR minim\* OR utilit\* OR consequen\*)) OR (qualit\* NEAR/2 adjust\* NEAR/2 (life-year\* OR lifeyear\*)) OR qaly\*))

AND (((((model OR modeling OR modelling OR simulation\* OR microsimulation\*) NEAR/5 (econom\* OR pharmacoconom\* OR cost OR costs)) OR (decision NEAR/2 (analy\* OR tree OR trees)) OR discrete-event\* OR "state transition" OR markov OR ((individual\* OR patient-level\*) NEAR/2 (sampl\* OR simulation\*)) OR (dynamic NEAR/2 transmission\*) OR probabilistic\* OR partition\*-.survival\*))

AND (((((personalized OR personalised OR individualised OR individualized OR precision OR stratif\* OR targeted\* OR algorithm\*) NEAR/5 (medicine\* OR therap\* OR treat\* OR risk OR regimen\* OR dosing\* OR duration OR decision\*)) OR ((genetic\* OR gene OR genom\* OR molecular\*) NEAR/2 (variation\* OR technique\* OR procedure\* OR test OR testing OR therap\* OR sequenc\* OR profil\*)) OR genotype\* OR (biologic\* NEAR/2 marker\*) OR biomarker\* OR immunotherap\* OR immunetherap\* OR immun\*-therap\* OR pharmacogenomic\* OR pharmacogenetic\* OR pharmacokinetic\* OR (pharmac\* NEAR/2 (genomic\* OR genetic\* OR kinetic\*)) OR (digital NEAR/2 (health OR medicine)) OR mHealth\* OR eHealth\* OR pharmacometabolom\* OR metabolom\* OR proteomic\* OR pharmacoproteomic\* OR lipidomic\* OR pharmacolipidomic\* OR omics OR (model\* NEAR/2 (guide\*OR base\*) NEAR/2 (medicine\* OR therap\* OR treat\* OR risk OR regimen\* OR dosing\* OR duration))

OR (risk NEAR/2 score\*)) AND (medicine OR health\* OR patient\* OR hospital\* OR therap\* OR genetic\* OR pharmac\* OR virus\* OR genotype\* OR disease\* OR diagnos\* OR cancer\*) NOT ((animal\*OR rat OR rats OR mouse OR mice OR murine OR dog OR dogs OR canine OR cat OR cats OR feline OR rabbit OR cow OR cows OR bovine OR rodent\* OR sheep OR ovine OR pig OR swine OR porcine OR veterinar\* OR chick\* OR zebrafish\* OR baboon\* OR nonhuman\* OR primate\* OR cattle\* OR gooseOR geese OR duck OR macaque\* OR avian\* OR bird\* OR fish\*) NOT (human\* OR patient\* OR womenOR woman OR men OR man)))

AND ( 2011:py OR 2012:py OR 2013:py OR 2014:py OR 2015:py OR 2016:py OR 2017:py OR 2018:py OR 2019:py OR 2020:py OR 2021:py)

AND DT=(article) AND LA=(english)

Web of Science™ Search Marked List History Alerts

Advanced Search > Results

2,312 results from Web of Science Core Collection:

(((TS=(((technology NEAR/2 assessment\*) OR (economic\* NEAR/2 (evaluat\* OR value)) OR ((cost OR costs) NEAR/2 (benefit\* OR effectiv...))

Analyze Results Citation Report Create Alert

More options ▲

Query Preview

```

(((TS=(((technology NEAR/2 assessment*) OR (economic* NEAR/2 (evaluat* OR value)) OR ((cost OR costs) NEAR/2 (benefit* OR effectiv* OR efficien* OR efficac* OR minim* OR utilit* OR consequen*)) OR (qualit* NEAR/2 adjust* NEAR/2 (life-year* OR lifeyear*) OR qualit*) AND TS= (((model OR modeling OR modelling OR simulation* OR microsimulation*) NEAR/5 (econom* OR pharmacoeconom* OR cost OR costs) OR (decision NEAR/2 (analy* OR tree OR trees) OR discrete-event* OR state transition* OR markov* OR ((individual* OR patient-level*) NEAR/2 (sampl* OR simulation*)) OR (dynamic NEAR/2 transmission*) OR probabilistic* OR partition*-survival*)) AND TS=(((personalized OR personalised OR individualised OR individualized OR precision OR stratif* OR targeted* OR algorithm*) NEAR/5 (medicine* OR therap* OR treat* OR risk OR regimen* OR dosing* OR duration OR decision*)) OR ((genetic* OR gene OR genom* OR molecular*) NEAR/2 (variation* OR technique* OR procedure* OR test OR testing OR therap* OR sequenc* OR profil*)) OR genotype* OR (biologic* NEAR/2 marker*) OR biomarker* OR immunotherap* OR immunetherap* OR immun*-therap* OR pharmacogenomic* OR pharmacogenetic* OR pharmacokinetic* OR (pharmac* NEAR/2 (genomic* OR genetic* OR kinetic*)) OR (digital NEAR/2 (health OR medicine)) OR mHealth* OR eHealth* OR pharmacometabolom* OR metabolom* OR proteomic* OR pharmacoproteomic* OR lipidomic* OR pharmacolipidomic* OR omics OR (model* NEAR/2 (guide* OR base*) NEAR/2 (medicine* OR therap* OR treat* OR risk OR regimen* OR dosing* OR duration) OR (risk NEAR/2 score*)) AND TS=(((medicine OR health* OR patient* OR hospital* OR therap* OR genetic* OR pharmac* OR virus* OR genotype* OR disease* OR diagnos* OR cancer*) NOT ((animal* OR rat OR mice OR mouse OR mice OR murine OR dog OR dogs OR canine OR cat OR cats OR feline OR rabbit OR cow OR cows OR bovine OR rodent* OR sheep OR ovine OR pig OR swine OR porcine OR veterinar* OR chick* OR zebrafish* OR baboon* OR nonhuman* OR primate* OR cattle* OR goose OR geese OR duck OR macaque* OR avian* OR bird* OR fish*) NOT (human* OR patient* OR woman OR woman OR men OR man))) AND DT=(article) AND LA=(english)

```

Index Date: 2011-01-01 to 2021-06-01 X Clear Search
